# Supplementary material for: Differential Expression Genes of the Head Kidney and Spleen in Streptococcus iniae-Infected East Asian Fourfinger Threadfin Fish (Eleutheronema tetradactylum)
Source: MDPI journal article supplement (doi:10.3390/ijms24043832), 2023-02-14
Supplement: s1 [file s1]

## Supplemental Tables

**Table S1 Sequences of primers used for quantitative real-time PCR.**

| Gene  |         | Sequence (5'- 3')         |
|-------|---------|---------------------------|
| C2    | Forward | GCATATTCACACAGAGAGTCAGAGG |
|       | Reverse | AGTCACATCAGTGGGCTGTTTTAG  |
| CCL2  | Forward | TGCTGTCTCCTGCCTCAACTC     |
|       | Reverse | TGGACTTGCGTGTTTGTAACCT    |
| CCR7  | Forward | TCGTTGTCCAAAACAGGACTATGT  |
|       | Reverse | TGCTGTGGTGGCTGTGTTC       |
| CD8A  | Forward | TCTGGTGATTCTGGTGTTTTATGC  |
|       | Reverse | TGTGGTTCTGTCCCTCTTTTACTTC |
| CSF3  | Forward | CAGATGATGATGAGCTCACTGG    |
|       | Reverse | TTTTCGCACAGAGGTTTGAGG     |
| CXCR4 | Forward | CAGCCACACACCCACATAGA      |
|       | Reverse | AACAGCCAAGCCACAAGAAAG     |
| HMBS  | Forward | CTCTACAACGGACAAGAGC       |
|       | Reverse | GATCTTACTGGCCGTGAC        |
| IL10  | Forward | GAACAACATCTTGGAGTTTTACCTG |
|       | Reverse | TGTCCTCGGTTTTGGTTATGG     |
| IL12A | Forward | ACGAAACTGCTATCAAGTCC      |
|       | Reverse | AGGAGTGCTTCTTCTTGATG      |

**Table S2. Summary of sequencing reads after filtering**

| Sample                 | Clean reads | Clean Bases | Q20 (%) | Q30 (%) | GC (%) |
|------------------------|-------------|-------------|---------|---------|--------|
| PBS_head kidney        | 32.5 M      | 9.7 G       | 97.7    | 93.6    | 49.7   |
| <i>SI</i> _head kidney | 35.1 M      | 10.5 G      | 97.7    | 93.6    | 49.8   |
| PBS_spleen             | 39.6 M      | 11.9 G      | 97.6    | 93.4    | 50.0   |
| <i>SI</i> _spleen      | 34.4 M      | 10.3 G      | 97.6    | 93.2    | 49.2   |

Clean data are read counts filtered from raw data; clean bases: base number of raw data after filtering, (number of clean reads)  $\times$  (sequence length). Q20: percentage of bases whose Q Phred values are greater than 20, (number of bases with Q Phred value  $> 20$ ) / (Number of total bases)  $\times 100$ ; Q30: percentage of bases whose Q Phred values are greater than 30, (number of bases with Q Phred value  $> 30$ ) / (number of total bases)  $\times 100$ ; GC: percentage of G and C bases out of the number of total bases, (G&C base number) / (Total base number)  $\times 100$ . PBS, phosphate-buffered saline; *SI*, *Streptococcus iniae*.

**Table S3 Length distribution and quality matrix of *de novo* assembled unigenes**

| <b>Sample</b>  | <b>Min<br/>Length</b> | <b>Mean<br/>Length</b> | <b>Median<br/>Length</b> | <b>Max<br/>Length</b> | <b>N50</b> | <b>N90</b> | <b>Total<br/>Unigene</b> |
|----------------|-----------------------|------------------------|--------------------------|-----------------------|------------|------------|--------------------------|
| Kidney_Unigene | 301                   | 1567                   | 848                      | 25024                 | 2781       | 590        | 37655                    |
| Spleen_Unigene | 301                   | 1574                   | 858                      | 23999                 | 2804       | 594        | 39965                    |

N50 and N90: weighted median statistics at which 50% and 90%, respectively, of the total length are contained in transcripts that are greater than or equal to this value.
